# Supplementary material for: Measurements of higher alkanes using NO + PTR-ToF-MS: significant contributions of higher alkanes to secondary organic aerosols in China
Source: Copernicus journal article supplement (doi:10.5194/acp-2020-145), 2020-03-30
Supplement: Supplementary file [file acp-2020-145-AC3-supplement.pdf]

## Response to anonymous referee #3

1  
2 In their manuscript, "Measurements of higher alkanes using NO<sup>+</sup> PTR-ToF-MS: significant  
3 contributions of higher alkanes to secondary organic aerosols in China," the authors tackle an  
4 important but often overlooked issue: the contribution of high-molecularweight gas-phase  
5 alkanes to SOA formation. A relatively large body of work over the last decade has provide a  
6 fairly thorough examination of the composition of vehicle emissions and the importance of  
7 branched (and cyclic) alkanes; this manuscript uses this work as a starting place to explore their  
8 contribution to SOA in China. The work is made possible in large part by the recent  
9 development of the NO<sup>+</sup> PTR. Overall, I think this work addresses interesting questions, and  
10 makes real efforts to tackle the complexity of calibrating a new instrument for compound  
11 classes that may contain hundreds of isomers. However, there are a few scientific weak spots  
12 that need to be addressed before this work is ready for publication. These larger comments  
13 include some needs for clarification, and some more fundamental issues with how OH exposure  
14 and SOA potential are being calculated. I commend the authors for taking a step into some  
15 unknown territory, but some additional discussion (and possibly work) needs to be included.

16 **Response:** Thank you very much for your valuable comments and suggestions on our  
17 manuscript. These comments are all helpful for improving our article. All the authors have  
18 seriously discussed about all these comments. According to your comments, we have tried best  
19 to modify our manuscript to meet with the requirements for the publication in this journal. The  
20 details about the calculation of OH exposure was added in the supporting information of the  
21 revised manuscript. Two methods to estimate SOA formation from different VOCs classes  
22 were all presented in the manuscript and the supporting information. Point-by-point responses  
23 to the comments are listed below.

### 24 **General Comments:**

25 (1) There are some typo and English issues throughout. It is not sufficient to seriously detract  
26 from the science, but it is to the degree that the authors should have a native English speaker  
27 review and edit this manuscript.

28 **Response:** Thanks for your nice suggestion.

29 (2) Considering the focus of this work is on large alkanes, and the semi-volatile nature of these  
30 components, particularly at the lower temperatures of some of these measurements, this  
31 manuscript really does not provide enough detail on the sample line and inlet. How long is this

32 sample line? Is it heated all the way to the sample inlet, or just in the room? If it is not heated  
33 all the way to the inlet, I would have some misgivings about alkanes about C14 or so, there  
34 could be substantial losses or time lags for larger alkanes. Is there any evidence (observations  
35 or models) that suggest line losses and delays can be ignored? If the authors want to focus on  
36 gas-phase measurements of S/IVOC alkanes, more detail needs to be provided for the sampling.

37 **Response:** We included more information about the sampling in the revised manuscript. The  
38 schematic drawing of the inlet system for the measurement during campaigns is shown in the  
39 attached figure (Fig S2, Wu et al., 2020). The sampling line is ~8 m and ~3 m during PRD  
40 campaign and NCP campaign respectively. Ambient air was continuously introduced into ToF-  
41 MS through a Teflon tubing (1/4") with an external pump at 5.0 L/min. The calculated  
42 residence time for the inlet was ~3 s for PRD campaign and ~1 s for NCP campaign,  
43 respectively. The sampling line was heated all the way to the sampling inlet by an insulating  
44 tube with a self-controlled heater wire (40 °C) wrapping outside. We conducted tubing loss  
45 experiments in the laboratory by introducing standards (2 ppb/1 ppb/0.5 ppb) of higher alkanes  
46 (*n*-C8-C15), monoaromatics (benzene, toluene, *o*-xylene, 1,2,4-trimethylbenzene), isoprenoids  
47 (isoprene,  $\alpha$ -pinene) and naphthalene into PTR-ToF-MS through a 8 m Teflon tubing (1/4") at  
48 room temperature with an external pump at 5.0 L/min (Figure S11). The tubing loss of these  
49 standard compounds is found to be <5% except *n*-C15 of ~8% and naphthalene of ~10%. Given  
50 the fact that the sampling line was heated at 40 °C all the way to the inlet during the campaigns,  
51 we think the tubing loss would be ignored.

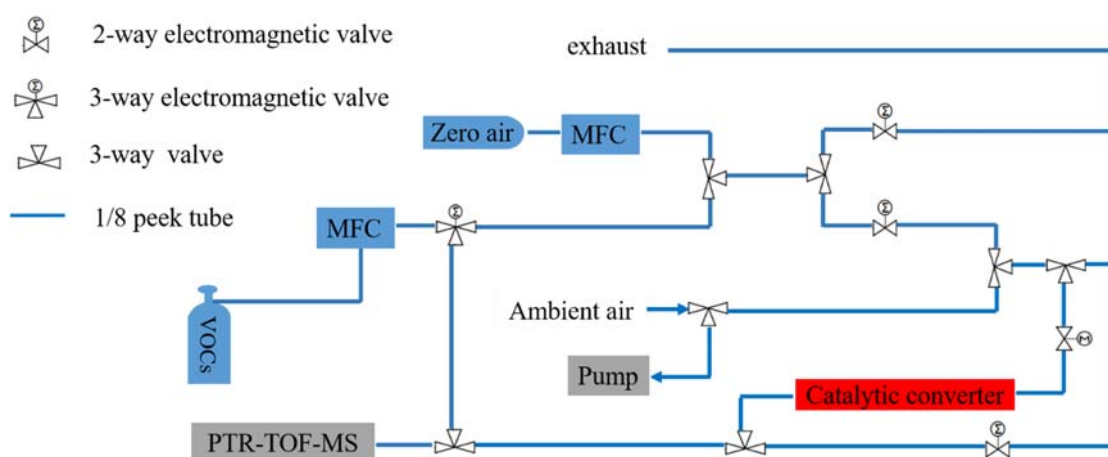

52  
53 **Figure S2.** Schematic drawing of the inlet system for PTR-ToF-MS during the campaign. (Wu  
54 et al., 2020)

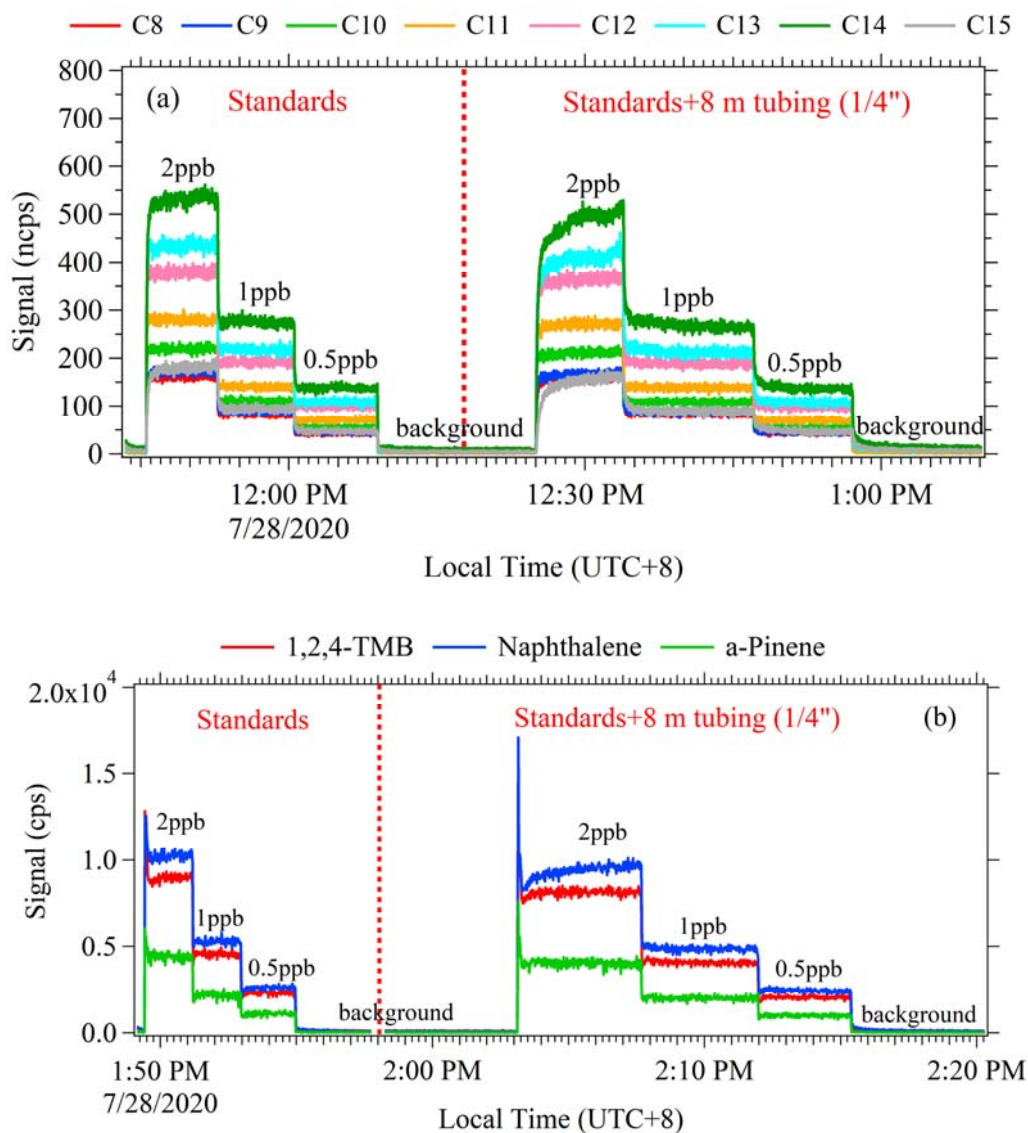

55

56 Figure S11. The tubing loss experiments of higher alkanes (*n*-C8-C15), 1,2,4-  
 57 trimethylbenzene,  $\alpha$ -pinene and naphthalene at room temperature using PTR-ToF-MS with an  
 58 external pump at 5.0 L/min.

59 The sentences on line 205-216 of page 9-10 are modified as follows:

60 “Ambient air was continuously introduced into PTR-ToF-MS through a Teflon tubing  
 61 (1/4”) with an external pump at 5.0 L/min, with tubing length of ~8 m and ~3 m during  
 62 the PRD and the NCP campaign, respectively. The inlet tubing was heated all the way to  
 63 the sampling inlet to avoid water vapour condensation by an insulating tube with a self-  
 64 controlled heater wire (40 °C) wrapping outside. The calculated residence time for the  
 65 inlet was ~3 s for PRD campaign and ~1 s for NCP campaign, respectively. The tubing  
 66 loss experiments were conducted in the laboratory by introducing standards of higher

67 **alkanes (*n*-C8-C15), monoaromatics (benzene, toluene, *o*-xylene, 1,2,4-trimethylbenzene),**  
68 **isoprenoids (isoprene,  $\alpha$ -pinene) and naphthalene into PTR-ToF-MS through a 8 m**  
69 **Teflon tubing (1/4") at room temperature with an external pump at 5.0 L/min (Figure**  
70 **S11). The tubing loss of these compounds is found to be <5% except *n*-C15 (~8%) and**  
71 **naphthalene (~10%)."**

72 3) In the discussion around "sensitivity", is that the response per mass of the *m*-1 ion, or the  
73 sum of all ions? If the former, it should be discussed in some of the relationships shown, as  
74 discussed in comments below. If the latter, how are those ions summed and attributed in the  
75 complex real-world data? Understanding of this terminology is critical for interpreting some of  
76 the figures.

77 Response: The "sensitivity" is that the response per mass of the *m*-1 ion with a unit of ncps/ppb  
78 in this study. We measured the fragmentation patterns of selected higher alkanes with NO<sup>+</sup>  
79 PTR-ToF-MS by introducing commercially acquired pure chemicals (Figure S8). We found  
80 that higher alkanes are mainly reacted through hydride abstraction by NO<sup>+</sup> forming mass (*m*-  
81 1) ions (*m* is the molecular mass). The fractions of *m*-1 ions account for more than 60% of total  
82 ion signals for >C12 *n*-alkanes (Figure 4 (a)). Thus, we use the response per mass of the *m*-1  
83 ion for each higher alkane when performing sensitivity experiments using a gas standard with  
84 a series of *n*-alkanes. We added a sentence on line 147-150 of page 7 in the revised manuscript  
85 to explain the "sensitivity" where this word was first mentioned.

86 **"Sensitivities of *n*-alkanes (C8-C15) standards were obtained during the campaign**  
87 **(Figure S6), which is defined as the normalized signal of hydride abstraction ions for each**  
88 **higher alkane at 1 ppbv with a unit of ncps/ppb."**

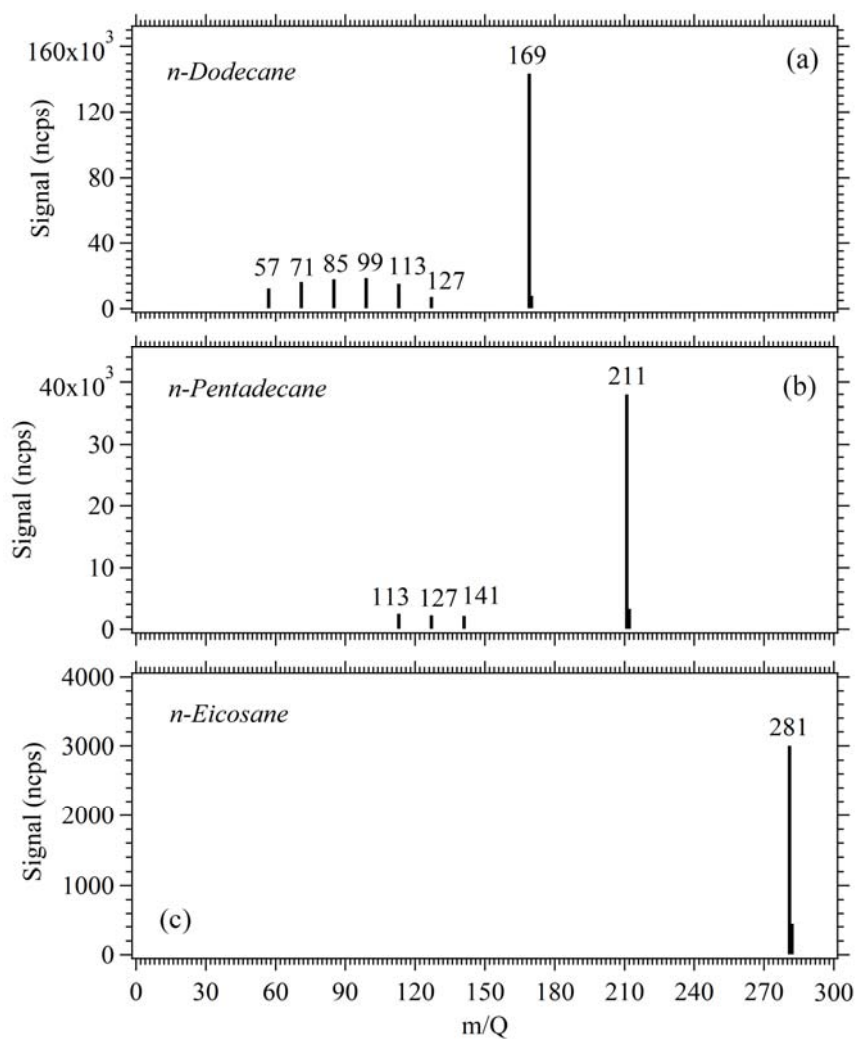

89

90 Figure S8. Mass spectra of the distributions of product ions from *n*-Dodecane **(a)**, *n*-  
 91 Pentadecane **(b)** and *n*-Eicosane **(c)** with  $\text{NO}^+$  PTR-ToF-MS. The signals of masses shown in  
 92 the graph are the results after subtracting the isotopic signals during the high resolution peak  
 93 fitting of the mass spectra.

94

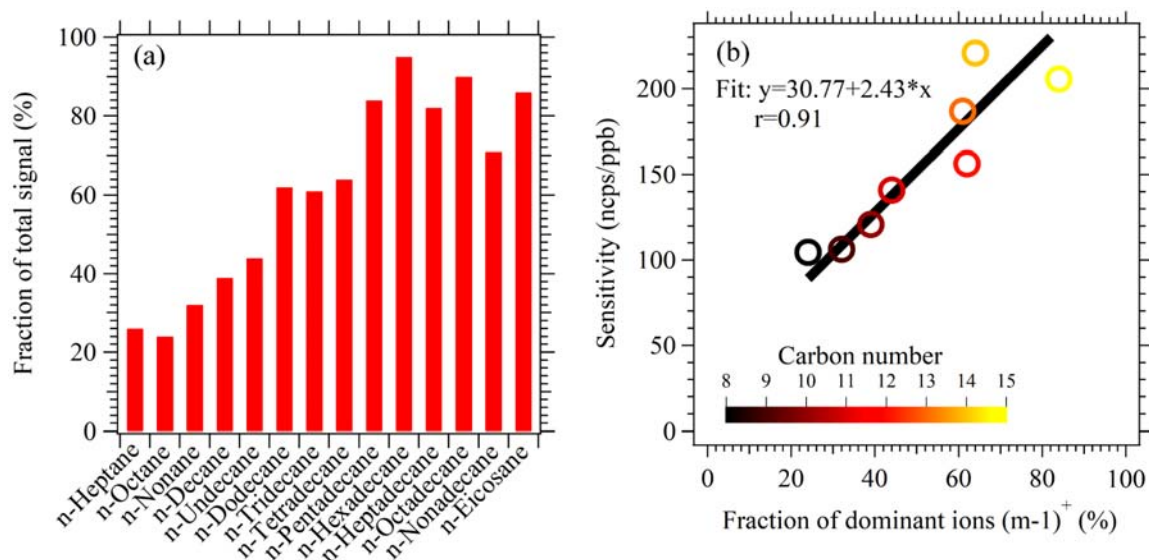

95

96 Figure 4. (a) The fractions of product ions (m-1) from hydride abstraction of C8-C20 *n*-alkanes  
 97 in NO<sup>+</sup> PTR-ToF-MS. (b) Scatterplot of sensitivities under dry conditions versus the fractions  
 98 of hydride abstraction ions for C8-C15 *n*-alkanes.

99 4) More detail is necessary on how they calculate OH exposure. I'm not familiar with the  
 100 isoprene chemistry method - please include a description. And for the ratio of aromatics method,  
 101 don't you need to start by assuming some ratio at the time of emissions? What is assumed here?  
 102 Why does the OH exposure diurnal (Figure S9) look very different for the biogenics and the  
 103 anthropogenics? Notably, in the NCP campaign this is also a large missing daytime source,  
 104 could this be related to a "mistiming" of SOA caused by a bias in the OH exposure calculation?  
 105 Or what might be the missing source?

106 Response: We included more detail about the calculations of OH exposure in the revised  
 107 supporting information. **The observed ratios between m+p-xylene and ethylbenzene were**  
 108 **used to estimate the OH exposure ( $[OH] \times \Delta t$ ) by Roberts et al. (1984):**

109 
$$[OH] \times \Delta t = \frac{1}{k_{m+p-xylene} - k_{ethylbenzene}} \times \left[ \ln\left(\frac{m+p-xylene}{ethylbenzene}\right)_{t=0} - \ln\left(\frac{m+p-xylene}{ethylbenzene}\right)_t \right]$$

110 **Where the initial emission ratios of m+p-xylene/ethylbenzene were estimated according to**  
 111 **the correlation of m+p-xylene with ethylbenzene during campaigns. The ratio of 4 and**  
 112 **1.5 were used in the PRD campaign and the NCP campaign, respectively (Figure S29).**



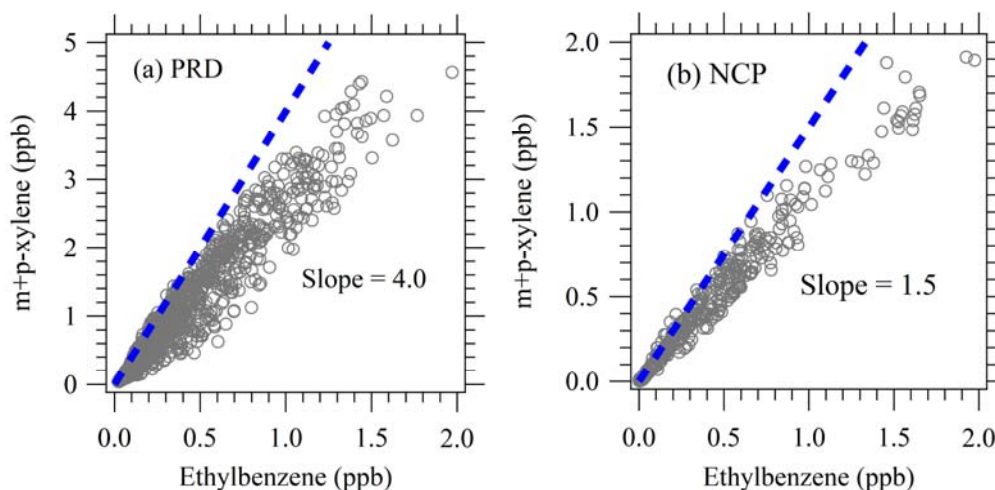

113

114 Figure S29. Correlation of m+p-xylene with ethylbenzene in PRD (a) and NCP (b). The dashed  
 115 lines in both graphs indicate the estimated initial mission ratio of m+p-xylene/ethylbenzene.

116 **Isoprene are mainly photo-oxidized through the reactions with OH radical in the**  
 117 **atmosphere and its primary first-generation reaction products are formaldehyde, MVK**  
 118 **and MACR (Apel et al., 2002) . The reaction processes of isoprene oxidized by OH radical**  
 119 **are mainly as follows:**

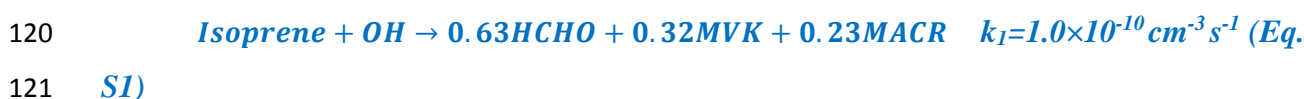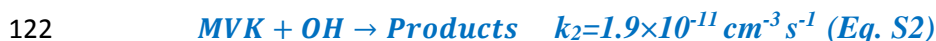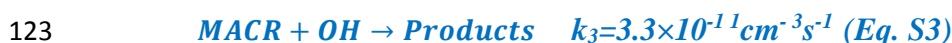

124 where  $k_1, k_2, k_3$  are the rate constants of the reactions. According to above reactions, the  
 125 relationship between MVK/Isoprene, MACR/Isoprene, (MVK+MACR)/Isoprene and the  
 126 reaction time  $\Delta t$  can be described as follows (Apel et al., 2002):

127 
$$\frac{\text{MVK}}{\text{Isoprene}} = \frac{0.32k_1}{k_2 - k_1} (1 - \exp((k_1 - k_2)[\text{OH}]\Delta t)) \quad \text{(Eq. S4)}$$

128 
$$\frac{\text{MACR}}{\text{Isoprene}} = \frac{0.23k_1}{k_3 - k_1} (1 - \exp((k_1 - k_3)[\text{OH}]\Delta t)) \quad \text{(Eq. S5)}$$

129 
$$\frac{\text{MVK} + \text{MACR}}{\text{Isoprene}} = \frac{0.32k_1}{k_2 - k_1} (1 - \exp((k_1 - k_2)[\text{OH}]\Delta t)) + \frac{0.23k_1}{k_3 - k_1} (1 - \exp((k_1 - k_3)[\text{OH}]\Delta t)) \quad \text{(Eq. S6)}$$

130 where  $\frac{\text{MVK} + \text{MACR}}{\text{Isoprene}}$  can be derived from the measurements by PTR-ToF-MS. Then the OH  
 131 exposure ( $[\text{OH}]\Delta t$ ) of isoprenoids can be obtained from Eq. S6.

132 The different diurnal patterns for the biogenics and the anthropogenics are mainly due  
133 to their different emission patterns. Much more fresh emissions for biogenic compounds during  
134 the daytime than nighttime, leading to the low OH exposure during the daytime for these  
135 compounds. The photochemical age of the air mass after mixing is the nonlinear addition of  
136 the photochemical age before mixing. Generally, the photochemical age of the mixed air mass  
137 is closer to that of the fresh air mass (Parrish et al., 1992). The large missing daytime source in  
138 the NCP might be some other SOA precursors or formation pathways (e.g. aqueous reactions)  
139 (Kuang et al., 2020)

140 The math on Eq. 1 makes sense, but I'm not sure the assumptions do. This assumes that the air  
141 behaves like a plug flow reactor from some emissions source, and then just oxidizes until the  
142 measurement site. Wouldn't local emissions (that perhaps have a different oxidation history)  
143 change things dramatically? Given that benzene and TMB aren't present in diesel or motor oil  
144 (which is the source of higher alkanes), this might be an issue. Though they are both from  
145 vehicle emissions, so maybe not. This might all be more compelling with more detail on how  
146 OH exposure is calculated.

147 Response: When calculating OH exposure for anthropogenic compounds, we use the ratio  
148 between m+p-xylene and ethylbenzene. Currently, given the fact that we don't have sufficient  
149 data to evaluate the specific contributions from different emission sources for all these  
150 anthropogenic compounds, we assume that m+p-xylene, ethylbenzene and higher alkanes have  
151 the same dominant emission sources during campaigns. In the near future, we will conduct  
152 VOCs measurements from typical emission sources in China.

153 Specific comments:

154 Line 135. The relationship between humidity and sensitivity seems fairly robust, so correctable,  
155 but I'm not sure a would classify a 50% drop in sensitivity as a "slight" decrease. If the  
156 "sensitivity" is to m-1, is the drop due to a change in fragmentation, or a drop in all ions? As it  
157 also due to a shift of  $\text{NO}^+$  to  $\text{H}_3\text{O}^+$  as water content increases, or does increasing humidity not  
158 increase  $\text{H}_3\text{O}^+$ ?

159 Response: We modified the description about the relationship between humidity and sensitivity.  
160 We did several times humidity experiments in the laboratory by diluting higher alkanes  
161 standard into humidified air (relative humidity of 0-95% at 25°C) to reach approximately 1 ppb  
162 mixing ratio. The Figure 3 (b, c) summarize all the experiments data at different times to derive



163 the relationships for C12 and C15 alkanes. The “sensitivity” is to m-1 ion. As shown in the  
164 attached Figure (a), the normalized signals of all product ions and the fragment ions are  
165 decreasing with the increase of humidity. These decreasing patterns are probably due to the  
166 decreasing reagent ions ( $\text{NO}^+$  and  $\text{O}_2^+$ ) as the humidity increases. Thus, the humidity correction  
167 should be applied for the quantitation of higher alkanes using  $\text{NO}^+$  PTR-ToF-MS.

168 We modified and added sentences on line 163-168 of page 7-8 in the revised manuscript  
169 as follows:

170 “As shown in Figure 3(b, c) and Figure S7 (a), the normalized signal of all product ions  
171 (m-1) and the fragment ions of *n*-alkanes (C8-C15) standards are decreasing with the  
172 increase of humidity. These decreasing patterns are probably due to the decreasing  
173 primary reagent ions ( $\text{NO}^+$  and  $\text{O}_2^+$ ) as the humidity increases Figure S7(b). Thus, the  
174 humidity correction should be applied for the quantitation of higher alkanes using  $\text{NO}^+$   
175 PTR-ToF-MS.”

176

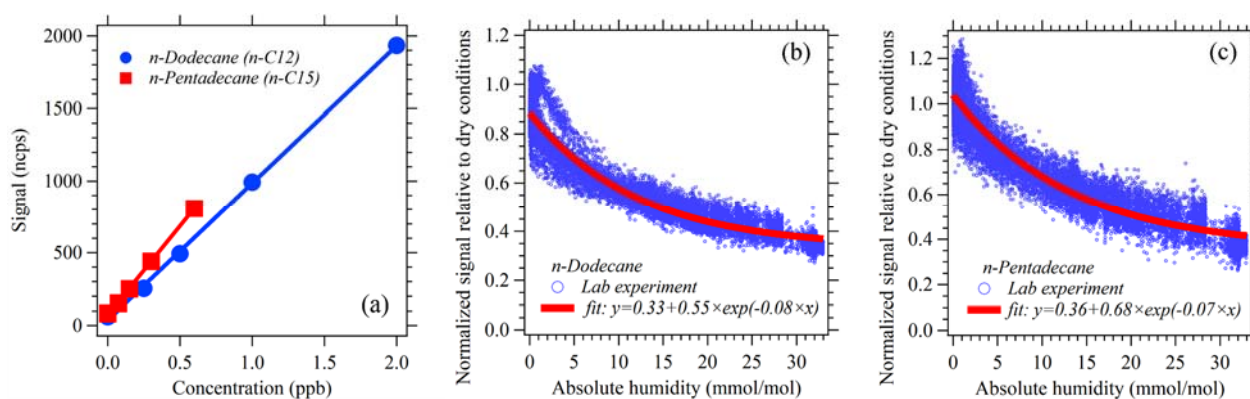

177

178 Figure 3. (a) Calibrations of *n*-Dodecane and *n*-Pentadecane under dry conditions; (b) Humidity  
179 dependence of *n*-Dodecane. (c) Humidity dependence of *n*-Pentadecane.

180

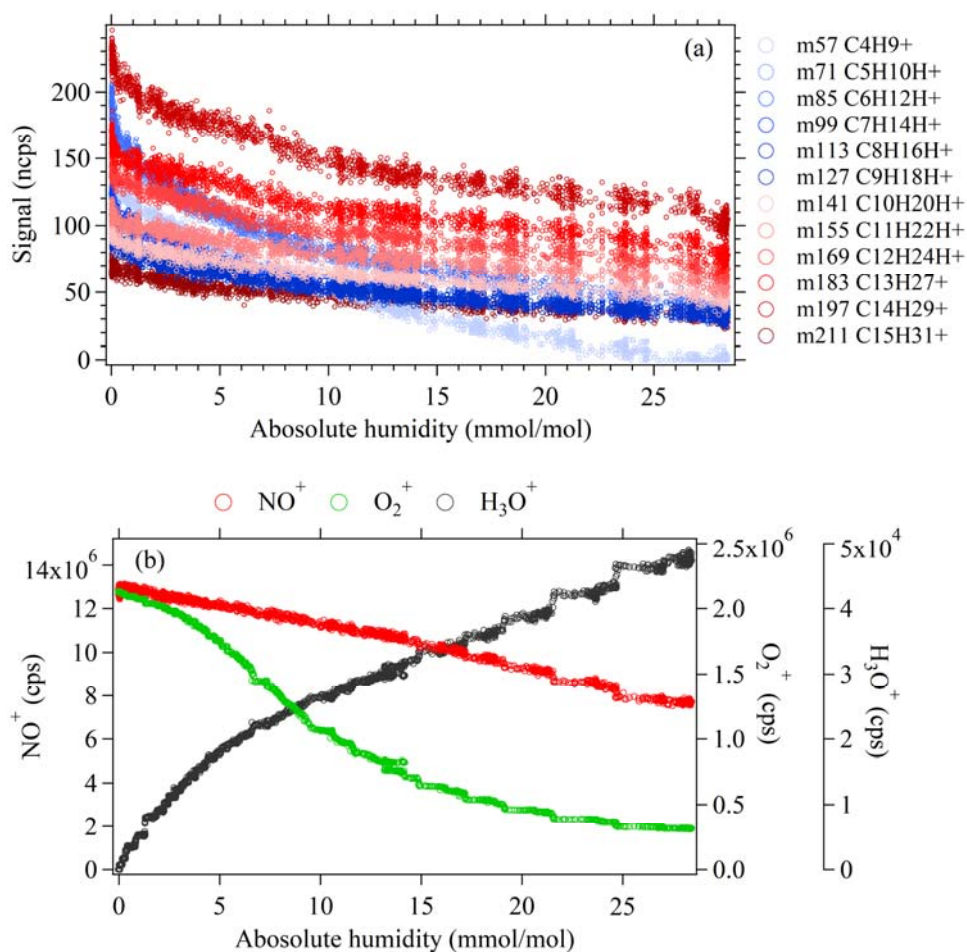

181

182 Figure S7. Humidity dependence of all product ions and the fragment ions for *n*-alkanes (C8-  
 183 C15) (a), and primary ions (NO<sup>+</sup>, O<sub>2</sub><sup>+</sup>, H<sub>3</sub>O<sup>+</sup>) (b).

184 Line 144. Is this slope between fraction of m-1 and sensitivity just due to the decrease m-1? In  
 185 other words, is the total ion count produced the same, and just the fragmentation different, or  
 186 is the total ion count lower for lower alkanes?

187 Response: We used a mixed standards of *n*-alkanes (C8-C15) to do the sensitivity experiments  
 188 with NO<sup>+</sup> PTR-ToF-MS. Since almost all the higher alkanes produce the fragmentation ions of  
 189 m/z 57, m/z 71, m/z 85, and m/z 99, we are not able to calculate the total ion count for each  
 190 higher alkane with our experiments in this study. But the reason for this slope might be explored  
 191 in the future when we have sufficient experimental conditions.

192 Line 144-145. Are calibrations of C16-C21 not available directly just because it is hard to get  
 193 them into the gas phase, or was there some other reason?

194 Response: The commercial mixed standards of *n*-alkanes (C8-C15) we used in this study are  
 195 all at 100 ppb except *n*-C15 at 30 ppb, because the lower vapour pressure of *n*-C15 make it

196 difficult to obtain higher concentration of 100 ppb in the same cylinder. The vapour pressures  
197 of *n*-C16-*n*-C21 are even lower than that of *n*-C15. It is not possible to prepare *n*-C16-*n*-  
198 C21 standards with concentrations of > 30 ppb into the mixed standards of *n*-alkanes (C8-C15)  
199 in the same cylinder. Moreover, the very low vapour pressure compounds are not stable in the  
200 cylinder.

201 Line 160. Should be "except" instead of "expect" Line 162. How was this switching achieved?  
202 Was it just a change in voltages? Are there residual effects observed, and/or do some  
203 transitional data need to be removed?

204 Response: We replaced the “expect” with “except” in the revised manuscript. More details  
205 about the automatic switches between H<sub>3</sub>O<sup>+</sup> chemistry and NO<sup>+</sup> chemistry are also included on  
206 line 199-205 of page 9 in the revised paper.

207 **“Switching between H<sub>3</sub>O<sup>+</sup> and NO<sup>+</sup> ion mode are provided by the PTR-MS Manager (v3.5)**  
208 **software developed by the Ionicon Analytik (Table S1). The pressures of drift chamber are**  
209 **held constant at 3.8 mbar in both modes during the campaigns (Figure S10(a)). It usually**  
210 **takes <10 s for H<sub>3</sub>O<sup>+</sup> ions and ~60 s for NO<sup>+</sup> ions to re-stabilize after automatically**  
211 **switching between the two measurement modes (Figure S10(b)). The ambient**  
212 **measurement data during the transition period (~1 min) was discarded.”**

213 Table S1. The settings of the voltages of ion source voltages (U<sub>s</sub>, U<sub>so</sub>), drift tube (U<sub>drift</sub>, U<sub>dx</sub>)  
214 and pressure of drift tube (p<sub>Drift</sub>) during automatical switching between NO<sup>+</sup> mode and H<sub>3</sub>O<sup>+</sup>  
215 mode, respectively.

| Setting            | NO <sup>+</sup> mode | H <sub>3</sub> O <sup>+</sup> mode |
|--------------------|----------------------|------------------------------------|
| U <sub>s</sub>     | 40 V                 | 150 V                              |
| U <sub>so</sub>    | 100 V                | 80 V                               |
| U <sub>drift</sub> | 470 V                | 920 V                              |
| U <sub>dx</sub>    | 23.5 V               | 46 V                               |
| p <sub>Drift</sub> | 3.8 mbar             | 3.8 mbar                           |

216

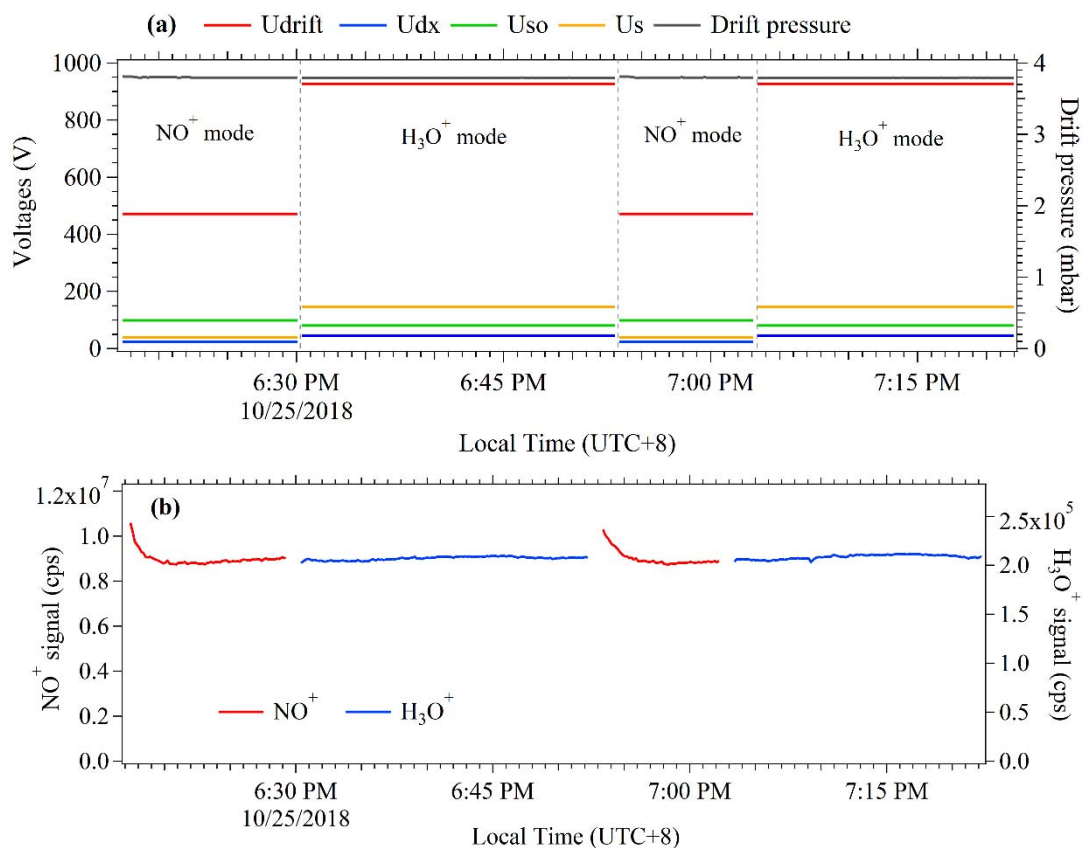

217

218 Figure S10. An example of the voltages of ion source voltages (Us, Uso), drift tube (Udrift,  
 219 Udx) and pressure of drift tube (a), and the signal changes of primary ions (b) during  
 220 automatical switching between NO<sup>+</sup> mode and H<sub>3</sub>O<sup>+</sup> mode, respectively.

221

222 Line 167. I'm not quite sure what the "insulated tube" is - do they mean heater rope or  
 223 something?

224 Response: We revised the sentence. **“The inlet tubing was heated all the way to the sampling  
 225 inlet to avoid water vapour condensation by an insulating tube with a self-controlled  
 226 heater wire (40 °C) wrapping outside.”**

227 Line 185. Do the authors mean there are limitations to its application? Or just that it hasn't  
 228 been applied very often?

229 Response: We revised the sentence. **“Although NO<sup>+</sup> chemistry has been shown to be  
 230 valuable in measuring many organic species, the applications in real atmosphere of  
 231 different environments are still rare”.**

232 Line 187-190. The comparison between H<sub>3</sub>O<sup>+</sup> and NO<sup>+</sup> and GC-MS/FID is very encouraging.  
233 There are some significantly non-unity slopes though (0.47 for benzene) -do the authors have  
234 an explanation for this?

235 Response: Yes, the benzene of H<sub>3</sub>O<sup>+</sup> measurement is not well consistent with that of NO<sup>+</sup>  
236 measurement in the formal period of PRD campaigns. We don't know the exact reason for this.  
237 Considering the good consistency of benzene between NO<sup>+</sup> measurement and GC-MS  
238 measurement, we used the benzene from NO<sup>+</sup> measurement in this study.

239 Line 276. A Table of SOA yields used would be helpful for the SI

240 Response: We included a table of SOA yields in the revised supporting information (Table S3).

241 Table S3. The calculated average SOA yields of higher alkanes in PRD and NCP.

242

| Compounds   | Formula                         | Average SOA | Average SOA |
|-------------|---------------------------------|-------------|-------------|
| Octane      | C <sub>8</sub> H <sub>18</sub>  | 0.003±0.002 | 0.006±0.004 |
| Nonane      | C <sub>9</sub> H <sub>20</sub>  | 0.010±0.005 | 0.017±0.010 |
| Decane      | C <sub>10</sub> H <sub>22</sub> | 0.026±0.012 | 0.040±0.021 |
| Undecane    | C <sub>11</sub> H <sub>24</sub> | 0.058±0.020 | 0.080±0.036 |
| Dodecane    | C <sub>12</sub> H <sub>26</sub> | 0.106±0.032 | 0.142±0.059 |
| Tridecane   | C <sub>13</sub> H <sub>28</sub> | 0.249±0.061 | 0.305±0.103 |
| Tetradecane | C <sub>14</sub> H <sub>30</sub> | 0.329±0.070 | 0.388±0.118 |
| Pentadecane | C <sub>15</sub> H <sub>32</sub> | 0.386±0.081 | 0.450±0.135 |
| Hexadecane  | C <sub>16</sub> H <sub>34</sub> | 0.428±0.086 | 0.492±0.141 |
| Heptadecane | C <sub>17</sub> H <sub>36</sub> | 0.488±0.096 | 0.556±0.156 |
| Octadecane  | C <sub>18</sub> H <sub>38</sub> | 0.664±0.079 | 0.704±0.139 |
| Nonadecane  | C <sub>19</sub> H <sub>40</sub> | 0.773±0.056 | 0.792±0.105 |
| Eicosane    | C <sub>20</sub> H <sub>42</sub> | 0.860±0.025 | 0.863±0.054 |
| Heneicosane | C <sub>21</sub> H <sub>44</sub> | 0.877±0.025 | 0.870±0.046 |

243 Line 301-304. Are there emissions sources for only alkanes? I would guess not, in which case  
244 these alkanes must be getting emitted alongside cyclic saturated hydrocarbons (e.g.,  
245 cycloalkanes), which actually contribute similar or more to petroleum fuels (e.g., Gentner et  
246 al., 2012, Table S5). These compounds are expected to have broadly similar (or slightly higher)  
247 SOA yields. This would have you substantially overestimating SOA in NCP at night - the  
248 authors should comment on possible explanations or biases.

249 **Response:** In this study, the higher alkanes represent only the total concentration of linear and  
250 branched isomers, without considering the cyclic alkanes. Yes, some studies have indicated  
251 that cyclic alkanes also contribute importantly to SOA formation (Tkacik et al., 2012; Gentner  
252 et al., 2012). In the near future, we will also try the possibility to measure these cyclic alkanes.  
253 Including these cyclic alkanes would enhance the estimation of SOA production shown in this  
254 study.

255 Figure 5. I'm not quite sure what data is being shown here. Gentner provides diesel fuel data  
256 in table S5 of that publication (this is used to approximate exhaust in that manuscript). That  
257 data doesn't agree with what is shown here though - for C8 it is 37%, and all the values are  
258 near or above 21%. The Isaacman paper is actually just a single fuel sample that is included in  
259 the Gentner data set, so could probable be excluded. That paper also provides gasoline data,  
260 which is not shown. In Figure 9 of the Chan paper, the branched-to-normal ratios are given for  
261 vehicle exhaust, which convert to between 13 and 41% normal for C24 through C21, which  
262 are fairly different than those shown. Similarly, in Figure 5, the branched-to-normal ratios for  
263 LA are shown at multiple oxidation times, and reach levels of 20 to 50% for those same carbon  
264 numbers - this is similar to the values shown, but I think not quite right. I think the numbers for  
265 Bakersfield (based on Figure 4 from that paper) should be much lower, 5-10%, for all carbon  
266 numbers. Values should also be included for direct vehicle emissions from Worton et al., 2014,  
267 [dx.doi.org/10.1021/es405375j](https://doi.org/10.1021/es405375j). Basically, some explanation for how these numbers were all  
268 compiled is necessary (even if it's just in the SI), because they don't look quite right to me.

269 **Response:** Linear alkanes and branched alkanes follow the same molecular formula:  $C_nH_{2n+2}$ .  
270 When using  $NO^+$  ToF-MS, we measure the total concentrations of linear alkanes and branched  
271 alkanes with the same formulas since this technique doesn't differentiate isomers. We collected  
272 data from literatures which are derived from GC-based techniques to calculate the mass  
273 fractions of *n*-alkanes in higher alkanes with the same formula from various ambient and  
274 emission studies, with the purpose of emphasizing the importance of contribution of branched



275 isomers to higher alkanes concentrations at each carbon number. The fraction of *n*-alkane at  
276 each carbon number is calculated as follows:

$$277 \quad \text{Fraction}_{linear} = \frac{\text{Concentration}_{linear}}{\text{Concentration}_{linear} + \text{Concentration}_{branched}} \times 100\%$$

278 As shown in the figure, *n*-alkanes contribute ~5-60% to higher alkanes concentrations  
279 from C8 to C25, indicating that branched isomers contribute up to ~40-95%. This indicates the  
280 measurement of branched isomers is also important. We checked the data collected from  
281 references and modified the figure (Figure 6) as suggested. A table of data used in this figure  
282 was also included in the revised supporting information (Table S2). The data from Worton et  
283 al., 2014 was not included because those high alkanes data are particle phase. In this study, we  
284 only focus on the gas phase alkanes and their importance to SOA.

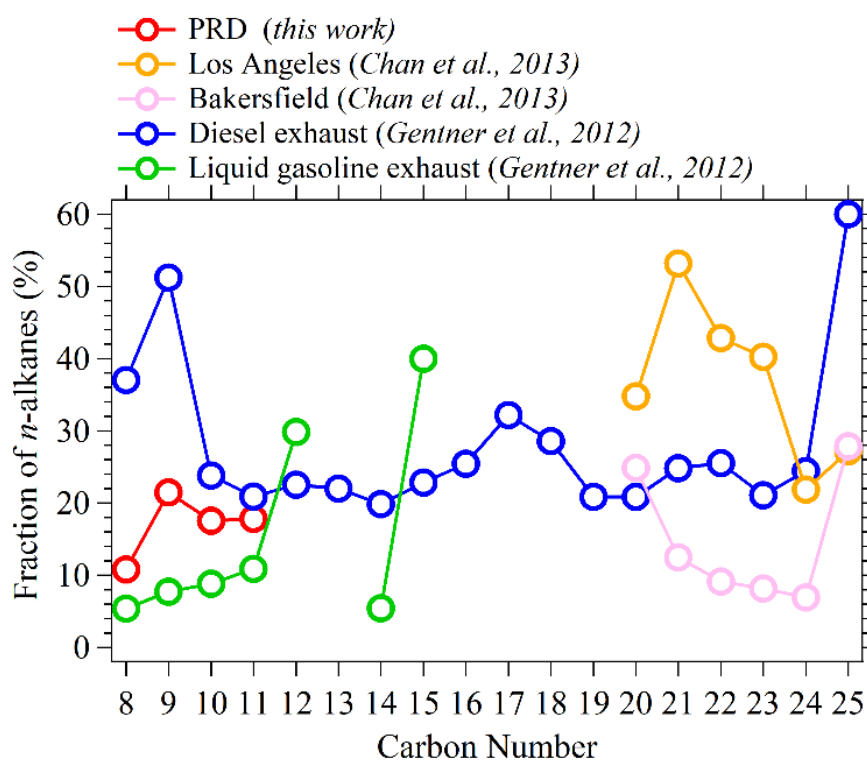

285  
286 Figure 6. Fractions of *n*-alkanes in higher alkanes with same formulas derived from this study,  
287 ambient air in Los Angeles, Bakersfield and in vehicle exhausts.

288

289 Table S2. Fractions of *n*-alkanes in higher alkanes with same formulas derived from this study,  
 290 ambient air in Los Angeles, Bakersfield and in vehicle exhausts.

| Carbon Number | Fraction of <i>n</i> -alkanes in higher alkanes with same formulas |                          |                          |                            |                                      |
|---------------|--------------------------------------------------------------------|--------------------------|--------------------------|----------------------------|--------------------------------------|
|               | PRD <sup>a</sup>                                                   | Los Angeles <sup>b</sup> | Bakersfield <sup>b</sup> | Diese exhaust <sup>c</sup> | Liquid gasoline exhaust <sup>c</sup> |
| 8             | 10.82                                                              | /                        | /                        | 37.04                      | 5.39                                 |
| 9             | 21.48                                                              | /                        | /                        | 51.22                      | 7.71                                 |
| 10            | 17.56                                                              | /                        | /                        | 23.81                      | 8.81                                 |
| 11            | 17.81                                                              | /                        | /                        | 20.91                      | 10.88                                |
| 12            | /                                                                  | /                        | /                        | 22.54                      | 29.82                                |
| 13            | /                                                                  | /                        | /                        | 21.98                      | /                                    |
| 14            | /                                                                  | /                        | /                        | 19.84                      | 5.41                                 |
| 15            | /                                                                  | /                        | /                        | 22.86                      | 40                                   |
| 16            | /                                                                  | /                        | /                        | 25.44                      | /                                    |
| 17            | /                                                                  | /                        | /                        | 32.16                      | /                                    |
| 18            | /                                                                  | /                        | /                        | 28.57                      | /                                    |
| 19            | /                                                                  | /                        | /                        | 20.83                      | /                                    |
| 20            | /                                                                  | 34.78                    | 24.85                    | 20.87                      | /                                    |
| 21            | /                                                                  | 53.16                    | 12.47                    | 24.82                      | /                                    |
| 22            | /                                                                  | 42.85                    | 9.11                     | 25.51                      | /                                    |
| 23            | /                                                                  | 40.24                    | 8.14                     | 21.05                      | /                                    |
| 24            | /                                                                  | 21.85                    | 6.92                     | 24.44                      | /                                    |
| 25            | /                                                                  | 27.17                    | 27.87                    | 60                         | /                                    |

291 <sup>a</sup>:This work; <sup>b</sup>: Chan et al., 2013; <sup>c</sup>: Gentner et al., 2012

292 Reference:

293 Apel, E. C., Riemer, D. D., Hills, A., Baugh, W., Orlando, J., Faloon, I., Tan, D., Brune, W.,  
294 Lamb, B., Westberg, H., Carroll, M. A., Thornberry, T., and Geron, C. D.: Measurement and  
295 interpretation of isoprene fluxes and isoprene, methacrolein, and methyl vinyl ketone mixing  
296 ratios at the PROPHET site during the 1998 Intensive, *Journal of Geophysical Research:*  
297 *Atmospheres*, 107, ACH 7-1-ACH 7-15, 10.1029/2000JD000225, 2002.

298 Chan, A. W. H., Isaacman, G., Wilson, K. R., Worton, D. R., Ruehl, C. R., Nah, T., Gentner,  
299 D. R., Dallmann, T. R., Kirchstetter, T. W., Harley, R. A., Gilman, J. B., Kuster, W. C.,  
300 deGouw, J. A., Offenberg, J. H., Kleindienst, T. E., Lin, Y. H., Rubitschun, C. L., Surratt, J.  
301 D., Hayes, P. L., Jimenez, J. L., and Goldstein, A. H.: Detailed chemical characterization of  
302 unresolved complex mixtures in atmospheric organics: Insights into emission sources,  
303 atmospheric processing, and secondary organic aerosol formation, *Journal of Geophysical*  
304 *Research-Atmospheres*, 118, 6783-6796, 10.1002/jgrd.50533, 2013.

305 Gentner, D. R., Isaacman, G., Worton, D. R., Chan, A. W. H., Dallmann, T. R., Davis, L., Liu,  
306 S., Day, D.A., Russell, L. M., Wilson, K. R., Weber, R., Guha, A., Harley, R. A., and Goldstein,  
307 A. H.: Elucidating secondary organic aerosol from diesel and gasoline vehicles through  
308 detailed characterization of organic carbon emissions, *Proceedings of the National Academy*  
309 *of Sciences of the United States of America*, 109, 18318-18323, 10.1073/pnas.1212272109,  
310 2012.

311 Kuang, Y., He, Y., Xu, W., Yuan, B., Zhang, G., Ma, Z., Wu, C., Wang, C., Wang, S., Zhang,  
312 S., Tao, J., Ma, N., Su, H., Cheng, Y., Shao, M., and Sun, Y.: Photochemical Aqueous-Phase  
313 Reactions Induce Rapid Daytime Formation of Oxygenated Organic Aerosol on the North  
314 China Plain, *Environmental Science & Technology*, 10.1021/acs.est.9b06836, 2020.

315 Roberts, J. M., Fehsenfeld, F. C., Liu, S. C., Bollinger, M. J., Hahn, C., Albritton, D. L., and  
316 Sievers, R. E.: Measurements of aromatic hydrocarbon ratios and NO<sub>x</sub> concentrations in the  
317 rural troposphere: Observation of air mass photochemical aging and NO<sub>x</sub> removal,  
318 *Atmospheric Environment* (1967), 18, 2421-2432, [https://doi.org/10.1016/0004-](https://doi.org/10.1016/0004-6981(84)90012-X)  
319 [6981\(84\)90012-X](https://doi.org/10.1016/0004-6981(84)90012-X), 1984.

320 Parrish, D. D., C. J. Hahn, E. J. Williams, R. B. Norton, F. C. Fehsenfeld, H. B. Singh, J. D.  
321 Shetter, B. W. Gandrud and B. A. Ridley. Indications of photochemical histories of Pacific air

322 masses from measurements of atmospheric trace species at Point Arena, California. *Journal of*  
323 *Geophysical Research: Atmospheres*, 1992, 97(D14): 15883-15901.

324 Roberts, J., Marchewka, M., Bertman, S., Goldan, P., Kuster, W., de Gouw, J., warneke, C.,  
325 Williams, E., Lerner, B., Murphy, P., Apel, E., and Fehsenfeld, F.: Analysis of the isoprene  
326 chemistry observed during the New England Air Quality Study (NEAQS) 2002 Intensive  
327 Experiment, *Journal of Geophysical Research-Atmospheres*, 111, D23S12,  
328 10.1029/2006JD007570, 2006.

329 Tkacik, D. S., Presto, A. A., Donahue, N. M., and Robinson, A. L.: Secondary Organic Aerosol  
330 Formation from Intermediate-Volatility Organic Compounds: Cyclic, Linear, and Branched  
331 Alkanes, *Environmental Science & Technology*, 46, 8773-8781, 10.1021/es301112c, 2012.

332 Wu, C., Wang, C., Wang, S., Wang, W., Yuan, B., Qi, J., Wang, B., Wang, H., Wang, C., Song,  
333 W., Wang, X., Hu, W., Lou, S., Ye, C., Peng, Y., Wang, Z., Huangfu, Y., Xie, Y., Zhu, M.,  
334 Zheng, J., Wang, X., Jiang, B., Zhang, Z., and Shao, M.: Measurement Report: important  
335 contributions of oxygenated compounds to emissions and chemistry of VOCs in urban air,  
336 *Atmos. Chem. Phys. Discuss.*, 2020, 1-37, 10.5194/acp-2020-152, 2020.
